# Expression of the Gene for Resistance to Phaseolotoxin (*argK*) Depends on the Activity of Genes *phtABC* in *Pseudomonas syringae* pv. *phaseolicola*

Selene Aguilera<sup>1</sup>, Susana De la Torre-Zavala<sup>1,2</sup>, José Luis Hernández-Flores<sup>1</sup>, Jesús Murillo<sup>3</sup>, Jaime Bravo<sup>1</sup>, Ariel Alvarez-Morales<sup>1\*</sup>

**1** Departamento de Ingeniería Genética, Centro de Investigación y de Estudios Avanzados (CINVESTAV), Irapuato, Guanajuato, México, **2** Instituto de Biotecnología, Facultad de Ciencias Biológicas, Universidad Autónoma de Nuevo León, Nuevo León, México, **3** Departamento de Producción Agraria, Universidad Pública de Navarra, Pamplona, Spain

## Abstract

The bacterium *Pseudomonas syringae* pv. *phaseolicola* produces phaseolotoxin in a temperature dependent manner, being optimally produced between 18°C and 20°C, while no detectable amounts are present above 28°C. Phaseolotoxin is an effective inhibitor of ornithine carbamoyltransferase (OCTase) activity from plant, mammalian and bacterial sources and causes a phenotypic requirement for arginine. To protect the cell from its own toxin, *P. syringae* pv. *phaseolicola* synthesizes a phaseolotoxin-resistant OCTase (ROCT). The ROCT is the product of the *argK* gene and is synthesized only under conditions leading to phaseolotoxin synthesis. The *argK* gene is included in a chromosomal fragment named Pht cluster, which contains genes involved in the synthesis of phaseolotoxin. The aim of the present work was to investigate the possible involvement of other genes included in the Pht cluster in the regulation of gene *argK*. We conducted transcriptional analyses of *argK* in several mutants unable to produce phaseolotoxin, transcriptional fusions and electrophoretic mobility shift assays, which allowed us to determine that genes *phtABC*, located within the Pht cluster, participate in the transcriptional repression of gene *argK* at temperatures not permissive for phaseolotoxin biosynthesis. This repression is mediated by a protein present in both toxigenic and nontoxigenic strains of *P. syringae* and in *E. coli*, and requires the coordinated participation of *phtA*, *phtB* and *phtC* products in order to carry out an efficient *argK* repression.

**Citation:** Aguilera S, De la Torre-Zavala S, Hernández-Flores JL, Murillo J, Bravo J, et al. (2012) Expression of the Gene for Resistance to Phaseolotoxin (*argK*) Depends on the Activity of Genes *phtABC* in *Pseudomonas syringae* pv. *phaseolicola*. PLoS ONE 7(10): e46815. doi:10.1371/journal.pone.0046815

**Editor:** Mikael Skurnik, University of Helsinki, Finland

**Received:** May 18, 2012; **Accepted:** September 5, 2012; **Published:** October 8, 2012

**Copyright:** © 2012 Aguilera et al. This is an open-access article distributed under the terms of the Creative Commons Attribution License, which permits unrestricted use, distribution, and reproduction in any medium, provided the original author and source are credited.

**Funding:** This work was funded by grants from CONACYT (Consejo Nacional de Ciencia y Tecnología; <http://www.conacyt.mx>), research grant SEP-2006-C01-49958/24089 to AAM and SA (Postdoctoral scholarship), and from the Spanish Plan Nacional I+D+I grant AGL2008-55311-CO2-01 (Ministerio de Ciencia e Innovación; <http://micinn.es/>), co financed by FEDER, to JM. The funders had no role in study design, data collection and analysis, decision to publish, or preparation of the manuscript.

**Competing Interests:** The authors have declared that no competing interests exist.

\* E-mail: aalvarez@ira.cinvestav.mx

## Introduction

Production of phaseolotoxin, a non host specific toxin, has been described in *Pseudomonas syringae* pv. *phaseolicola*, which infects bean (*Phaseolus vulgaris* L), *P. syringae* pv. *actinidiae*, which infects kiwi (*Actinidia chinensis*), and in strain CFBP3388 of *P. syringae* pv. *syringae*, isolated from vetch (*Vicia sativa*) [1,2,3]. There are natural strains of these pathovars that do not produce the toxin and that do not contain the DNA responsible for its synthesis [3,4,5,6] indicating that the ability to produce phaseolotoxin has been acquired after pathovar delineation as a recent event [7]. Analysis of the conservation of the phaseolotoxin biosynthesis genes in a broad collection of *P. syringae* pv. *phaseolicola* and pv. *actinidiae* strains, as well as in pv. *syringae* strain CFBP3388, suggests that genes for the biosynthesis of phaseolotoxin have a complex evolutionary history and have been acquired by pathovars of *P. syringae* at least twice during evolution [6].

The production of phaseolotoxin is temperature dependent, being optimally produced between 18°C and 20°C, while no detectable amounts are present above 28°C [8,9,10]. Phaseolotoxin is composed of two moieties: the inorganic moiety, N<sup>δ</sup> N<sup>ε</sup>-

sulfodiaminophosphinyl, and the L-ornithyl-alanyl-homoarginine tripeptide [1,11]. Targets of this toxin are the enzymes ornithine carbamoyltransferase (OCTase; EC 2.1.3.3) [12], which catalyzes the formation of citrulline from ornithine and carbamoylphosphate in the arginine biosynthetic pathway, and ornithine decarboxylase, which participates in the biosynthesis of polyamines [13]. Phaseolotoxin is an effective inhibitor of OCTase activity from plant, mammalian and bacterial sources and causes a phenotypic requirement for arginine. This property led to the development of a rapid bioassay that evaluates growth inhibition of a bacterial culture exposed to this toxin [14].

To protect itself from its own toxin, *P. syringae* pv. *phaseolicola* synthesizes a phaseolotoxin-resistant OCTase (ROCT) [12,15,16,17,18]. The ROCT, which is the product of the *argK* gene and is expressed under conditions leading to phaseolotoxin synthesis, is a polypeptide composed of 327 amino acid residues with a molecular mass of 36.52 kDa, [18,19,20]. ROCT is necessary for *P. syringae* pv. *phaseolicola* under conditions of phaseolotoxin synthesis, because it ensures an optimal supply of the arginine required for growth and synthesis of phaseolotoxin [21].

Several efforts have been made to determine how *argK* is regulated. It has been postulated that *argK* might be regulated at 28°C under negative control by a repressor protein [20]. This repressor protein could bind to specific DNA motifs found in the *argK* promoter that have been postulated to be involved in thermoregulation of phaseolotoxin synthesis [22,23]. Additionally, carbamoylphosphate is able to induce *argK* expression, bypassing the temperature control [21]. Since carbamoylphosphate is a compound resembling the inorganic moiety of phaseolotoxin, N<sup>δ</sup> N'-sulfodiaminophosphinyl, these results suggested that *argK* is being directly regulated by a molecule that may be a precursor of phaseolotoxin and only indirectly by temperature [21]. On the other hand, the OCTase present under conditions nonpermissive for phaseolotoxin synthesis in *P. syringae* pv. phaseolicola, encoded by gene *argF*, is negatively regulated by ArgR [24]. However, production of ROCT and synthesis of phaseolotoxin occur independently of ArgR. Therefore there is not any apparent metabolic link between the genes for phaseolotoxin synthesis/resistance and the genes involved in the primary metabolism [24].

Genes required for the biosynthesis of and resistance to phaseolotoxin are grouped in the so-called Pht cluster and are included into a genomic region that has the characteristics of a pathogenicity island [15,25,26,27,28]. The Pht cluster is composed of 23 genes and it is flanked by insertion sequences and transposases. The 23 genes are organized in five transcriptional units (Figure 1A), two monocistronic and three polycistronic, with one of them overlapping a larger operon. Mutagenesis of 14 genes within the Pht cluster resulted in three mutants showing low levels of toxin production, while a Tox- phenotype was shown for the eleven remaining mutants [25].

The two-component system and global regulators GacS/GacA also participate in the regulation of phaseolotoxin biosynthesis [29], and in a *gacA*<sup>-</sup> background it was evident the downregulation of genes within operons *phtA*, *phtD*, *phtL* and *phtM*, whose

expression was negligible at 18°C. Interestingly, gene *argK* losses its temperature-dependent expression in a *gacA*<sup>-</sup> background and, in contrast with the rest of the genes within the Pht cluster, it becomes constitutive at both 18°C and 28°C [29].

We investigated the possible involvement of other genes included in the Pht cluster in the regulation of the *argK* gene. To this end, we analyzed the transcription of *argK* in several mutants unable to produce phaseolotoxin, and we also conducted electrophoretic mobility shift assays, which allowed us to determine that genes *phtABC*, included in the Pht cluster, are required to control *argK* transcription in response to temperature in *P. syringae* pv. phaseolicola NPS3121. We also report that to carry out an efficient *argK* repression, it is necessary the coordinated participation of the products of *phtA*, *phtB* and *phtC*.

## Results

### *argK* transcriptional analysis in a group of mutants

We analyzed the effect on *argK* expression of mutations on different genes of the Pht cluster, including polar mutants YNorf1P, SAorf5P, SAorf10P and AT3, altered in genes *phtA*, *phtE*, *phtL* and *amtA*, respectively (Table 1) [25,30]. To assess the expression pattern of gene *argK* at 18°C and 28°C in these mutants with respect to the wild type strain NPS3121, we conducted Reverse Transcription-PCR analysis (RT-PCR) aimed to amplify specific fragments derived from cDNA.

In mutant YNorf1P, the *argK* gene showed an increased expression at 28°C, unlike what happens in strain NPS3121 at the same temperature (Figure 1B), indicating that a mutation on the *phtA* operon resulted in alleviation of the repression of *argK* at a nonpermissive temperature for phaseolotoxin synthesis. These results are compatible with previous reports postulating that in *P. syringae* pv. phaseolicola, the *argK* gene could be regulated under negative control by a repressor protein at 28°C [20]. Conversely,

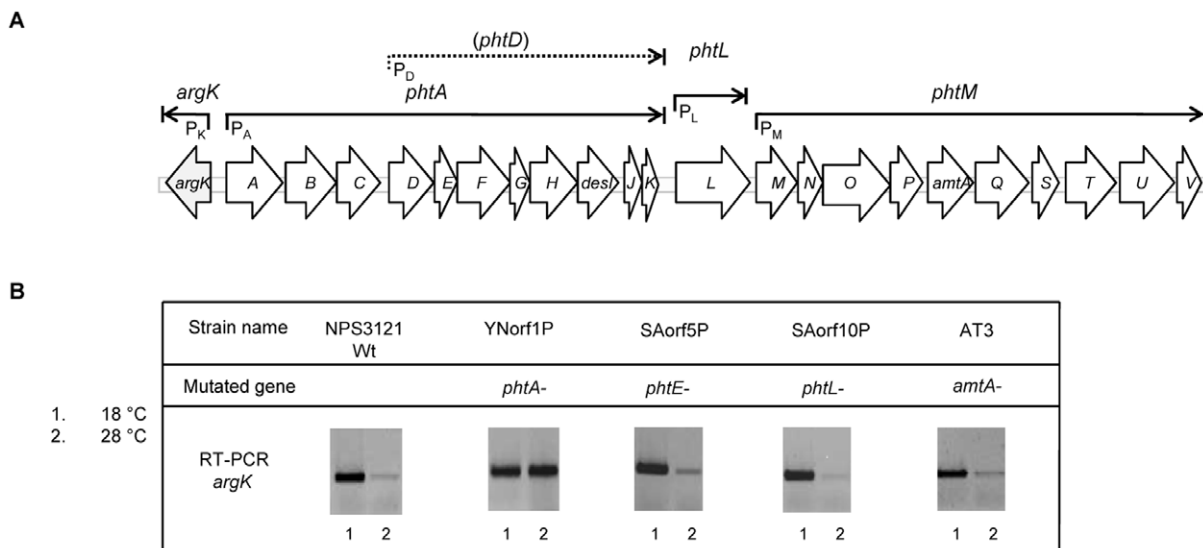

**Figure 1. Participation of genes from the phaseolotoxin biosynthesis cluster in the expression of gene *argK* from *P. syringae* pv. phaseolicola NPS3121.** A. Graphic representation of the phaseolotoxin biosynthesis cluster (Pht cluster) of *P. syringae* pv. phaseolicola NPS3121. The Pht cluster contains five transcriptional units, including two monocistronic (*argK* and *phtL*) and three polycistronic operons (*phtA*, *phtD* and *phtM*) [25]. There is a secondary promoter ( $P_D$ ) capable of driving the expression of genes from *phtD* to *phtK*. Genes are represented by arrows, with the direction of the arrow indicating the direction of transcription. B. Analysis of the *argK* transcriptional pattern in *P. syringae* pv. phaseolicola NPS3121 and polar mutants by reverse transcription-PCR. RT-PCR amplicons were separated by electrophoresis, and reversed images of the gels are shown; the strains analyzed and the corresponding mutated genes are described on top of their corresponding lanes. The small numbers under the lanes represent the temperature at which expression was assayed: 1 indicates 18°C and 2 indicates 28°C. doi:10.1371/journal.pone.0046815.g001

**Table 1.** Bacterial strains and plasmids.

| Strain or plasmid        | Relevant characteristics                                                                                                                   | Reference or source |
|--------------------------|--------------------------------------------------------------------------------------------------------------------------------------------|---------------------|
| <b>Bacterial strains</b> |                                                                                                                                            |                     |
| <i>Escherichia coli</i>  |                                                                                                                                            |                     |
| DH5 $\alpha$             | <i>supE44</i> $\Delta$ <i>lacU169</i> ( $\Phi$ 80/ <i>lacZ</i> $\Delta$ M15) <i>hsdR17 recA1 endA1 gyrA96 thi-1 relA1</i> Nal <sup>r</sup> | [41]                |
| <i>P. syringae</i>       |                                                                                                                                            |                     |
| pv. phaseolicola         |                                                                                                                                            |                     |
| NPS3121                  | Wild type, Tox <sup>+</sup>                                                                                                                | [27]                |
| CYL233                   | Wild type, Tox <sup>-</sup>                                                                                                                | [5]                 |
| YNorf1P                  | Tc <sup>r</sup> ; <i>phtA::tet</i> polar mutant of NPS3121                                                                                 | [25]                |
| SAorf5P                  | Tc <sup>r</sup> ; <i>phtE::tet</i> polar mutant of NPS3121                                                                                 | [25]                |
| SAorf10P                 | Km <sup>r</sup> ; <i>phtL::uidA-aph</i> polar mutant of NPS3121                                                                            | [25]                |
| AT3                      | Km <sup>r</sup> ; <i>amtA::aph</i> polar mutant of NPS3121                                                                                 | [30]                |
| pv. tomato DC3000        | Rif <sup>r</sup> derivative of NCPPB1106                                                                                                   | [42]                |
| pv. syringae B728a       | Wild type; Rif <sup>r</sup> , Cu <sup>r</sup> , Str <sup>r</sup>                                                                           | [43]                |
| pv. glycinea PG4180      | Wild type                                                                                                                                  | [35]                |
| <b>Plasmids</b>          |                                                                                                                                            |                     |
| pUCP20                   | <i>Pseudomonas-E. coli</i> shuttle vector; Ap <sup>r</sup> ; 3.89-kb; <i>lacZ'</i>                                                         | [31]                |
| pWM6                     | Source of GUS cassette                                                                                                                     | [47]                |
| pSAK                     | Ap <sup>r</sup> ; <i>argK</i> in pUCP20                                                                                                    | This study          |
| pSAK-A                   | Ap <sup>r</sup> ; <i>argK-phtA</i> in pUCP20                                                                                               | This study          |
| pSAK-B                   | Ap <sup>r</sup> ; <i>argK-phtB</i> in pUCP20                                                                                               | This study          |
| pSAK-C                   | Ap <sup>r</sup> ; <i>argK-phtC</i> in pUCP20                                                                                               | This study          |
| pSAK-AB                  | Ap <sup>r</sup> ; <i>argK-phtAB</i> in pUCP20                                                                                              | This study          |
| pSAK-BC                  | Ap <sup>r</sup> ; <i>argK-phtBC</i> in pUCP20                                                                                              | This study          |
| pSAK-AC                  | Ap <sup>r</sup> ; <i>argK-phtAC</i> in pUCP20                                                                                              | This study          |
| pSAK-ABC                 | Ap <sup>r</sup> ; <i>argK-phtABC</i> in pUCP20                                                                                             | This study          |
| pSAF                     | Ap <sup>r</sup> ; <i>uidA</i> in pUCP20                                                                                                    | This study          |
| pSAF <sub>KA</sub>       | Ap <sup>r</sup> ; <i>uidA-P<sub>KA</sub></i> in pUCP20                                                                                     | This study          |
| pSAF-A                   | Ap <sup>r</sup> ; <i>uidA-P<sub>K</sub>-phtA</i> in pUCP20                                                                                 | This study          |
| pSAF-B                   | Ap <sup>r</sup> ; <i>uidA-P<sub>K</sub>-phtB</i> in pUCP20                                                                                 | This study          |
| pSAF-C                   | Ap <sup>r</sup> ; <i>uidA-P<sub>K</sub>-phtC</i> in pUCP20                                                                                 | This study          |
| pSAF-AB                  | Ap <sup>r</sup> ; <i>uidA-P<sub>K</sub>-phtAB</i> in pUCP20                                                                                | This study          |
| pSAF-BC                  | Ap <sup>r</sup> ; <i>uidA-P<sub>K</sub>-phtBC</i> in pUCP20                                                                                | This study          |
| pSAF-AC                  | Ap <sup>r</sup> ; <i>uidA-P<sub>K</sub>-phtAC</i> in pUCP20                                                                                | This study          |
| pSAF-ABC                 | Ap <sup>r</sup> ; <i>uidA-P<sub>K</sub>-phtABC</i> in pUCP20                                                                               | This study          |

doi:10.1371/journal.pone.0046815.t001

transcription of gene *argK* in mutants SAorf5P, SAorf10P and AT3, affected in genes *phtE*, *phtL* and *amtA*, respectively, was similar to that in wild type strain NPS3121 at both temperatures. Since a mutation into gene *phtE*, which belongs to the *phtA* operon, did not modify *argK* expression at 28°C, it is likely that only genes located upstream to *phtE* could be participating in *argK* regulation (Figures 1A;1B).

#### Mutant YNorf1P showed an increase in OCTase activity at 28°C

Based in the previous RT-PCR analyses showing an increase in *argK* expression at 28°C in mutant YNorf1P (Figure 1B) and considering that the *argK* gene codes for the phaseolotoxin-resistant OCTase, we analyzed the OCTase specific activity at 28°C in YNorf1P in comparison to that of the wild type strain NPS3121. In order to discard any activity corresponding to the phaseolo-

toxin-sensitive OCTase, we preincubated the reaction mixture with a phaseolotoxin containing supernatant; later, OCTase activity was determined as previously reported [24]. The results obtained are shown in Figure 2. In agreement with the results obtained by RT-PCR, we observed a significant increase in the OCTase activity in YNorf1P compared with NPS3121, indicating that the *argK* expression level observed at 28°C was directly related to an increase in the OCTase activity.

#### Effect of *phtABC* genes on *argK* expression pattern in *P. syringae* pv. phaseolicola strain CYL233

Since *argK* transcription was unambiguously de-repressed at 28°C in mutant YNorf1P, we decided to determine which genes from the *phtA* operon could participate in *argK* regulation. The *phtA* operon contains 11 genes, from *phtA* to *phtK*, which are transcribed divergently to the *argK* gene, although it also possesses an internal

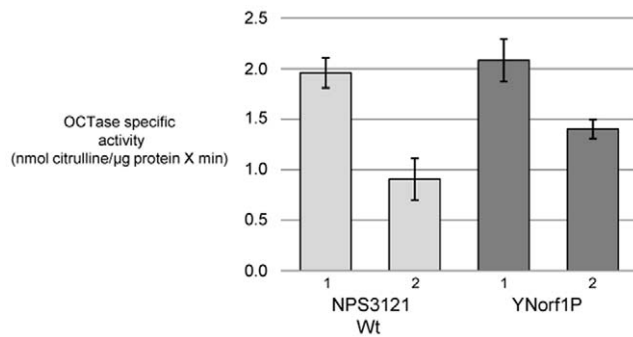

**Figure 2. Ornithine carbamoyltransferase (OCTase) specific activity of strains *P. syringae* pv. phaseolicola NPS3121 and YNorf1P.** The strains analyzed are described under their corresponding value bars; YNorf1P is a derivative of NPS3121 with *phtA* inactivated by site-directed mutagenesis. The small numbers under the bars represents the temperature at which expression was carried out: 1 indicates 18°C and 2 indicates 28°C. Error bars represent standard deviation from triplicate samples.

doi:10.1371/journal.pone.0046815.g002

promoter immediately downstream of *phtC*, capable of driving expression of *phtD* to *phtK* (Figure 1A). Additionally, RT-PCR analyses indicated that a polar mutation in gene *phtE* did not modify *argK* expression at 18°C and 28°C (Figure 1B). Therefore, we focused our analysis in the participation of genes *phtA*, *phtB* and *phtC* in the *argK* regulation considering that *phtE* gene belongs to the *phtD* operon. To carry out our experiments we decided to use the *P. syringae* pv. phaseolicola wild type strain CYL233 with the aim to discard the participation of other genes from the Pht cluster. It was reported that strain CYL233 is naturally unable to synthesize phaseolotoxin because it lacks the entire Pht cluster for phaseolotoxin biosynthesis [5,6]. PCR analyses using primers directed to all genes from the Pht cluster did not yield any amplification product using DNA from CYL233 as template (data not shown), supporting the idea that this strain really lacks the entire Pht cluster.

Plasmids pSAK; pSAK-A; pSAK-B; pSAK-C; pSAK-AB; pSAK-BC; pSAK-AC and pSAK-ABC were constructed containing genes *argK*; *argK-phtA*; *argK-phtB*; *argK-phtC*; *argK-phtAB*; *argK-phtBC*; *argK-phtAC* and *argK-phtABC* cloned into pUCP20, respectively (Table 1; Figure 3A). These constructions were electroporated into *P. syringae* pv. phaseolicola strain CYL233 and the *argK* expression pattern was evaluated by Northern blot analysis.

**a) *argK* expression in *P. syringae* pv. phaseolicola CYL233 wild type strain.** Strains were grown in M9 medium at 18°C and 28°C. In strain CYL233(pSAK) we observed *argK* transcripts at both temperatures, as it occurs in mutant YNorf1P and in contrast with the expression observed in the wild type strain NPS3121, where *argK* expression is only observed at 18°C (Figure 4A). These results indicate that the molecule that repress *argK* gene expression at 28°C is either not present or inactive in the wild type strain CYL233, suggesting that this repressor molecule could be coded within the Pht cluster. On the other hand, the *argK* expression observed at 18°C in strain CYL233 was similar to that in strain NPS3121 (Figure 4A), showing that the Pht cluster is dispensable to carry out an efficient *argK* transcription.

**b) Effect of *phtA*, *phtB* and/or *phtC* on *argK* transcription in strain *P. syringae* pv. phaseolicola CYL233.** We evaluated the effect of *phtA*, *phtB* and *phtC* on *argK* transcription. To achieve this we constructed different plasmids containing *argK* and a combination of genes *phtA*, *phtB* and *phtC* transcribed divergently to *argK* (Figure 3A) that were transferred to strain *P. syringae* pv.

phaseolicola CYL233. Northern blot analyses revealed a clear *argK* transcriptional repression effect when this gene was transcribed together with *phtABC* in strain CYL233 at both temperatures (Figure 4B). This repression effect was not so efficient with other combination of genes *phtA*, *phtB* and *phtC* (Figure 4B).

### Effect of *phtABC* genes on *argK* transcription *in trans* in strain *P. syringae* pv. phaseolicola NPS3121

To evaluate this, we introduced plasmids pSAK and pSAK-ABC in the wild type strain NPS3121 and evaluated the expression pattern of *argK* in each derivative (Figure 4C). In strain NPS3121(pSAK), we could still observe *argK* expression at 28°C (Figure 4C). This result was not unexpected, since pSAK is a plasmid that occurs in multiple copies [31] and the cloned *argK* gene would probably titrate the putative repressor. However, in a NPS3121 derivative containing pSAK plus genes *phtABC* (plasmid pSAK-ABC, Figure 3), the transcription of *argK* was regulated by temperature.

### Induction of *argK* expression with carbamoylphosphate in strain *P. syringae* pv. phaseolicola CYL233

A model of phaseolotoxin regulation has been proposed in which, at permissive temperature for phaseolotoxin production, 18°C, an inducer molecule could bind the postulated repressor molecule of *argK* to release it from the *argK* operator allowing its expression [21]. It has also been proposed that such inducer could be a precursor of phaseolotoxin. Carbamoylphosphate, which presents a similar structure to that of the inorganic moiety of phaseolotoxin, induces *argK* expression at 28°C [21]. We decided to determine whether this molecule was able to eliminate the *argK* transcriptional repression caused by *phtABC*. Northern blot analyses of RNA extracted from cells grown in M9 medium at 28°C until the end of the logarithmic phase, showed that there was not a de-repression effect caused by carbamoylphosphate in strain CYL233(pSAK-ABC) (Figure 4D).

### Transcriptional fusions to the *uidA* reporter gene in strain *P. syringae* pv. phaseolicola CYL233

In order to investigate the regulatory mechanism exerted by *phtA*, *phtB* and *phtC* products on *argK* transcription, we decided to construct transcriptional fusions to *uidA* (GUS) reporter gene (Figure 3B). Transcription of the GUS reporter gene was determined in the wild type strain CYL233 by a qualitative colorimetric assay using X-Gluc as substrate. The strains were grown in M9 medium at 18°C and 28°C, and the presence or absence of blue color in the culture medium was evaluated. Reporter activation was detected for cultures of CYL233(pSAF-P<sub>KA</sub>), indicating that the *argK* promoter (P<sub>KA</sub>) was able to drive *uidA* expression (Figure S1). Likewise, we observed *argK* promoter activity for all the constructions containing genes *phtA*, *phtB* or *phtC*, either by themselves or in combination (Figure S1). The only exception was CYL233(pSAF-ABC), containing genes *phtABC*, which resulted in cultures that did not develop any color; moreover, with this strain we could not detect even the background blue color produced with the promoterless construct, pSAF. These results complement our observations obtained by Northern blot hybridization, and support the hypothesis that the *phtABC* products participate in the transcriptional regulation of gene *argK*, interacting either directly or indirectly with the *argK* promoter.

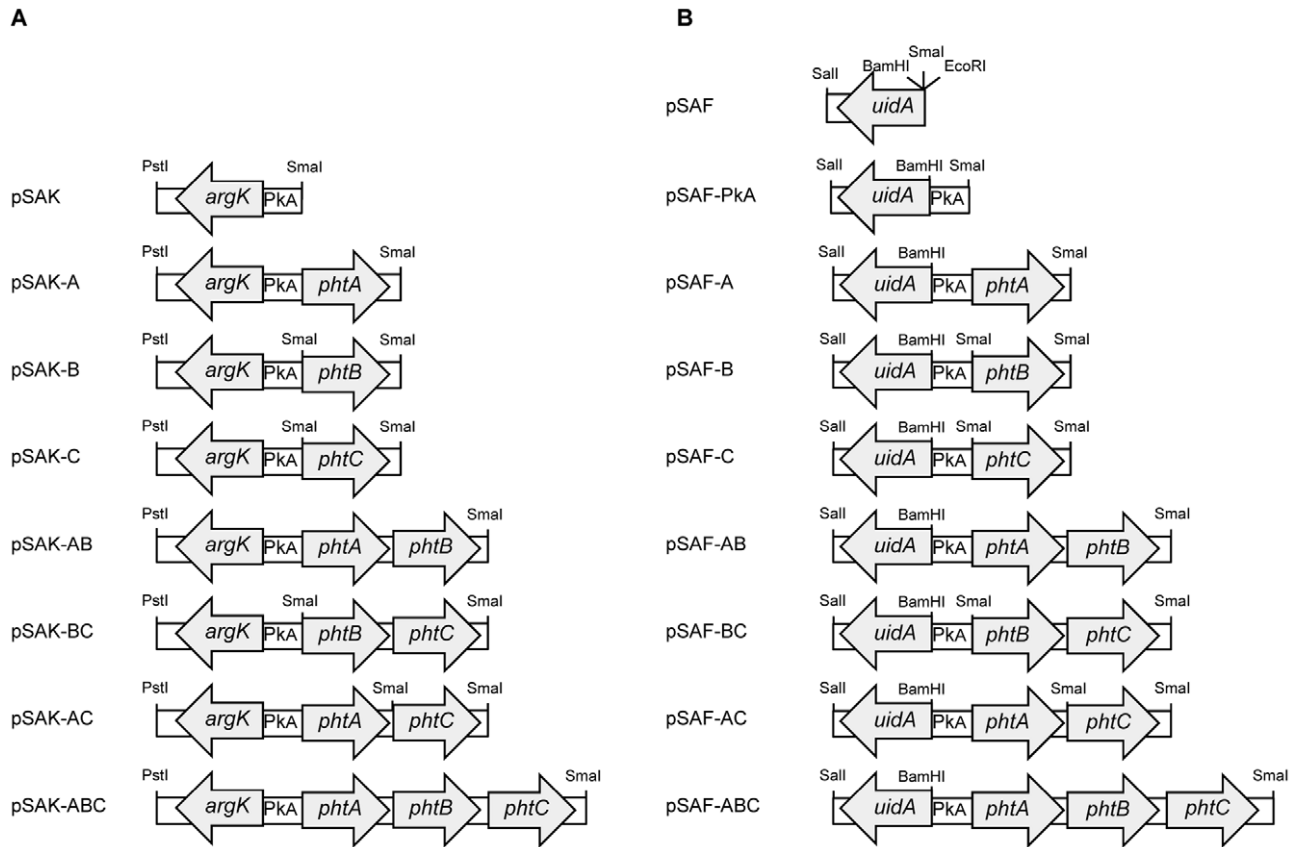

**Figure 3. Schematic representation of plasmid clones used for expression analyses.** Each arrow represents each gene amplified and cloned into pUCP20. Each plasmid name is indicated at left. The direction of the arrow indicates the direction of transcription. All restriction sites for PstI, SmaI, Sall, BamHI and EcoRI are shown. A. Constructs used in Northern blot analyses. B. Constructs to evaluate the activity of the *argK* gene using transcriptional *uidA* fusions.

doi:10.1371/journal.pone.0046815.g003

### DNA electrophoretic mobility shift assay

Results obtained using transcriptional fusions suggest that the *phtA*, *phtB* and *phtC* products participate in the regulation of gene *argK* at the transcriptional level. To analyze the possibility that the *phtABC* products could bind to the promoter region of *argK* we performed an electrophoretic mobility shift assay. The *argK* promoter has been previously defined and shown to be a Pribnow ( $\sigma 70$ ) type promoter with appropriate  $-10$  and  $-35$  regions [19,20].

Experiments were carried out by using a 288-bp DNA probe from the *argK* promoter region containing the  $-10$  and  $-35$  regions. A clear retardation signal of the  $P_K$  probe was observed when crude extracts from NPS3121, CYL233 and CYL233(pSAK-ABC) strains, grown at  $18^\circ\text{C}$  or  $28^\circ\text{C}$  in M9 medium, were added to the retardation mixture (Figure 5A). These results indicate that a molecule coded within the chromosome of *P. syringae* pv. phaseolicola was bound to this probe. Also, a second retardation signal was observed when crude extracts from CYL233(pSAK-ABC) strain grown at  $28^\circ\text{C}$  were added to the retardation mixture (Figure 5A). Specific binding to the *argK* promoter probe was demonstrated when the nonlabeled  $P_K$  probe efficiently replaced the labeled probe, causing the almost complete disappearance of the retardation signal. A nonlabeled *argF* promoter probe failed to compete the binding of the labeled  $P_K$  probe (Figure 5A); indicating that unspecific binding to the probe was not occurring.

We observed a second retardation signal when the  $P_K$  probe was incubated with crude extracts from strain CYL233 containing genes *phtABC* (Figure 5A); however, it is unlikely that the products of these genes will directly bind to the *argK* promoter. The deduced product of *phtA* belongs to the “P-loop containing nucleoside triphosphate hydrolases” superfamily (InterPro SSF52540), whereas there were no hits for the products of *phtB* and *phtC* in an InterProScan comparison. Therefore, these products probably do not have DNA binding domains that would suggest a possible function as repressor proteins. Additionally, database comparisons using available BLAST [32] did not find any similarity with proteins related to transcription factors or DNA binding proteins.

We decided to investigate whether the proteins binding the *argK* promoter were present in other *P. syringae* pathovars and in *E. coli*. Results are shown in Figure 5B, where we observed only one retardation signal in all strains, indicating that all analyzed strains produce the unknown protein that binds to the *argK* promoter.

### Discussion

Regulation of the phaseolotoxin biosynthesis cluster is very complex and there are at least three regulatory circuits that differentially affect its five transcriptional units. The global regulators GacA/GacS are required for the expression of all the transcriptional units, except for *argK*, which becomes constitutive in a *gacA*<sup>-</sup> mutant background [29]. Additionally, the expression of the *phtM* transcriptional unit depends on the activity of gene

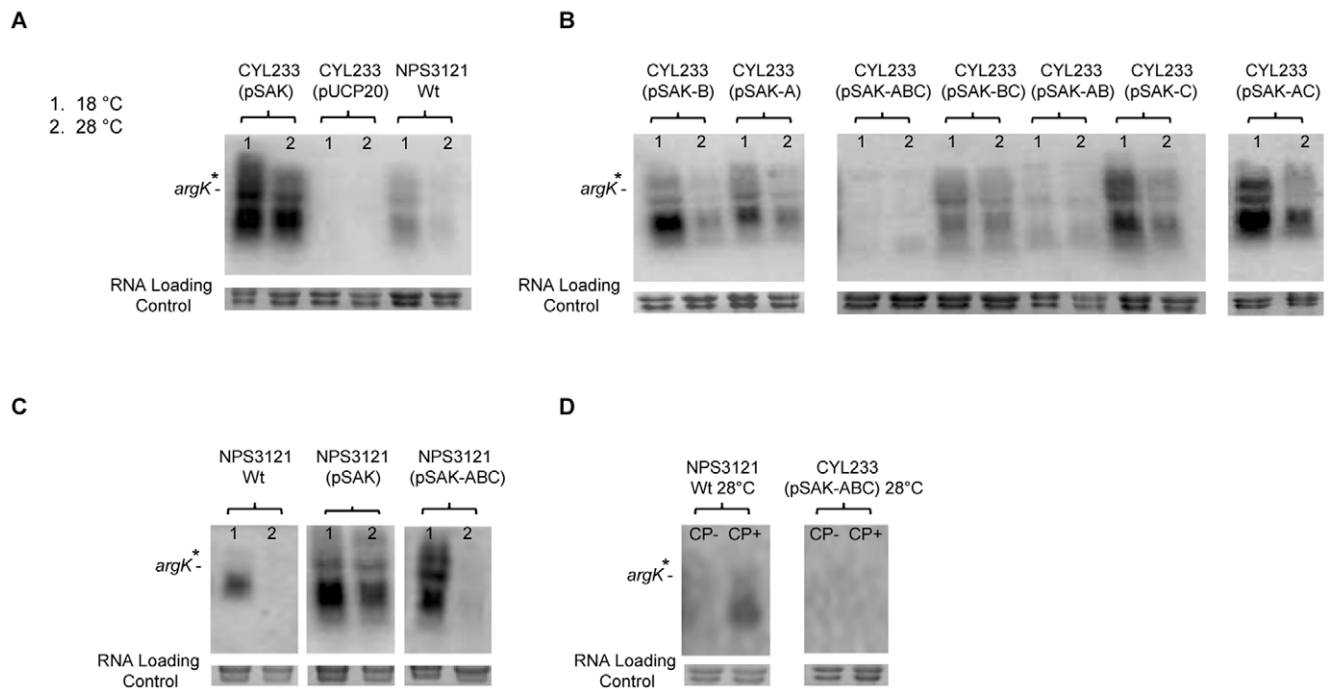

**Figure 4. Effect of cloned *argK* and *phtABC* genes on the *argK* expression in *P. syringae* pv. phaseolicola.** The expression of *argK* was evaluated by Northern blot in derivatives of strain CYL233 (nontoxicogenic; panels A and B) and strain NPS3121 (toxigenic, panel C) harboring plasmids with diverse combinations of genes *argK*, *phtA*, *phtB* and *phtC*, as indicated above each blot (see Figure 3 for a description of each plasmid). Panel D shows the expression of *argK* in the absence or presence of carbamoylphosphate (CP) in strains NPS3121 and CYL233 at 28°C. Blots were hybridized with an internal probe specific for *argK*, and the signal corresponding to the monocistronic *argK* RNA is marked. The asterisks indicate the position of a band of approximately 2.3-kb, corresponding to a previously described possible alternative *argK* transcript. Strain CYL233(pUCP20) was used as negative control of *argK* expression, whereas the wild type strain NPS3121 was used as a positive control. The numbers on top of the Northern blots represent the temperatures at which expression was assayed: 1 indicates 18°C and 2 indicates 28°C.  
doi:10.1371/journal.pone.0046815.g004

*phtL*, also included in the Pht cluster [25]. Finally, the global regulator IHF (Integration Host Factor) participates in the repression control of the *phtD* operon [33].

Expression of gene *argK*, conferring resistance to phaseolotoxin, appears to depend on different regulatory circuits than the rest of the Pht cluster. It is well known that fragments containing genes involved in toxin synthesis commonly carry regulatory elements that directly control the expression of biosynthetic genes [34]. An example are *corP*, *corS*, and *corR* genes, a modified two-component regulatory systems involved in the regulation of coronatine synthesis by *P. syringae* pv. glycinea PG4180. These regulatory genes have been located within the coronatine gene cluster [34,35,36]. In support of early predictions about *argK* regulation [20,21,22,23], our results indicate that regulation of *argK* in *P. syringae* pv. phaseolicola NPS3121 is carried out by a repressor protein that prevents its expression at 28°C; additionally, we show that genes *phtABC*, from the Pht cluster, are essential for this repression.

The unknown protein participating in the repression of gene *argK* appears to be normally present in a variety of bacteria, because crude cell extracts from different *P. syringae* and *E. coli* strains contained a protein able to bind the *argK* promoter. This is not surprising, because it is well known that several regulatory genes involved in phytotoxin synthesis could also be coded outside the toxin biosynthesis cluster [34,37,38]. An example are the syringomycin and syringopeptin biosynthesis clusters from *P. syringae* pv. syringae, which are regulated by a two components regulatory system, GacS/GacA, and the regulator SalA, all coded outside the toxins gene clusters [37,39]. Additionally, several genes

located outside the Pht cluster are involved in phaseolotoxin synthesis and regulation in *P. syringae* pv. phaseolicola NPS3121. These genes include locus PSPPH\_4550, coding for a putative nonribosomal peptide synthetase involved in phaseolotoxin production [29]; the GacS/GacA system, which is involved in the global regulation of phaseolotoxin biosynthesis genes [29] and the integration host factor, which participates in the repression of the *phtD* operon [33]. These facts, along with the results from this work support the idea that, following its acquisition by horizontal transfer, the Pht cluster has integrated into the regulatory circuits of *P. syringae* pv. phaseolicola.

The putative *argK* repressor protein was also present in the nontoxicogenic strain *P. syringae* pv. phaseolicola CYL233, as shown by a specific retardation of the Pk promoter in gel-shift assays. Unlike what happened with other bacteria, we observed a second retardation signal when using extracts from strain CYL233 containing *phtABC* and grown at 28°C, which necessitates of further experiments for clarification. Nevertheless, it is unlikely that the products of genes *phtABC* bind directly to the *argK* promoter to repress transcription, because they did not contain any conserved regulatory or DNA-binding domain in comparison with the InterPro databases. Gene *phtA* belongs to the P-loop containing nucleoside triphosphate (NTP) hydrolases superfamily (InterPro SSF52540), whose members can function as kinases with very different specificities as different kinds of motor proteins and as batteries to drive reactions through conformational change [40], suggesting an enzymatic role for the corresponding *phtA* product. We can therefore speculate that the products of the *phtABC* genes participate in the biosynthesis of a phaseolotoxin precursor that

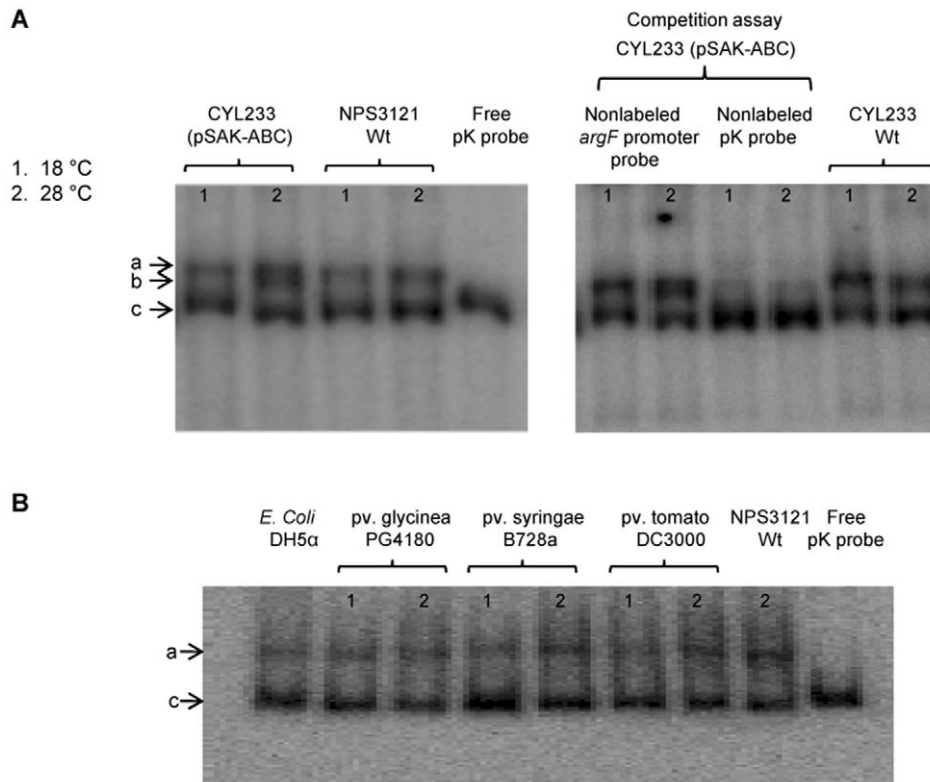

**Figure 5. Gel retardation assay using an *argK* promoter ( $P_K$ ) probe. The strains analyzed are described on top of their corresponding lanes. A. Gel retardation and competition assays using *P. syringae* pv. phaseolicola NPS3121 and CYL233. B. Gel retardation assay using *E. coli* DH5 $\alpha$  and *P. syringae* pv. glycinea PG4180, *pv. syringae* B728a and *pv. tomato* DC3000. The  $P_K$  probe plus extract from the wild type strain NPS3121 grown at 28°C was used as positive control. The extract from *E. coli* DH5 $\alpha$  was obtained from cells grown in LB at 37°C. "a" and "b" indicate the position of retardation signals; "c" indicates the position of free probe. The numbers on top of each lane represent the temperatures at which the cells were grown: 1 indicates 18°C and 2 indicates 28°C.**

doi:10.1371/journal.pone.0046815.g005

can also bind the *argK* repressor molecule, leading to active repression. Genes *phtABC* lead to a very efficient repression of *argK* transcription in the nontoxigenic strain CYL233, when all were cloned in a high-copy number vector; remarkably, this repression was not alleviated at 18°C, a temperature at which *argK* is normally expressed. However, *argK* displayed the wild type expression pattern (i.e., expressed at 18°C but not at 28°C) when using the same construction in the toxigenic strain NPS3121. Carbamoylphosphate is one of the substrates for OCTase in the arginine biosynthesis pathway, and exogenously supplied carbamoylphosphate was shown to induce *argK* expression at 28°C in strain NPS3121 [21]. However, carbamoylphosphate did not relieve the repression of *argK* in strain CYL233. We do not have yet a satisfactory explanation for this result, although a likely possibility is that other genes of the Pht cluster are involved in the transformation of carbamoylphosphate into an inducer of *argK* transcription. This is the first study that identify genes involved in *argK* regulation in *P. syringae* pv. phaseolicola. Further work to understand this intriguing and interesting regulatory mechanism is currently under way in our laboratory.

## Materials and Methods

### Media, bacterial strains and supplements

The bacterial strains and plasmids used in this study are listed in Table 1. *Escherichia coli* strains were grown in Luria Bertani (LB) medium at 37°C [41]. *P. syringae* pathovars [42,43] and mutant

derivatives [25] were routinely grown on King's B medium [44] or M9 medium [41] at 18°C or 28°C. *P. syringae* pv. phaseolicola NPS3121 and *P. syringae* pv. phaseolicola CYL233 are referred to as wild type strains. Supplements were added to the following final concentrations: carbenicillin, 100  $\mu$ g/ml; kanamycin, 50  $\mu$ g/ml; tetracycline, 10  $\mu$ g/ml and X-Gluc (5-bromo-4-chloro-3-indolyl- $\beta$ -D-glucuronic acid), 20  $\mu$ g/ml.

### Molecular biology techniques

Routine techniques were performed as described [41]. Purification of DNA from agarose gels and plasmid minipreps were performed using Qiagen columns and kits (Valencia, Ca, USA). Chromosomal DNA from *P. syringae* pv. phaseolicola was obtained as described [45]. DNA fragments used as probes for Northern blots were labelled with [ $\alpha$ -<sup>32</sup>P]dCTP using the Rediprime random primer labeling kit (Amersham). Protein concentration in bacterial lysates was estimated by the procedure of Bradford [46].

### Analysis of *argK* transcriptional pattern by Reverse Transcription-PCR analysis

DNA-free RNA was obtained from cultures grown in M9 medium at 18°C and 28°C when they reached an O.D.<sub>600</sub> of 0.8. The RNA integrity was verified in a denaturing agarose gel and used for reverse transcription (RT) and PCR using the SuperScript One-Step kit (Invitrogen). Samples of RNA (20 ng) were used in each RT-PCR reaction. A 608-bp DNA amplicon from gene *argK*

was obtained by RT-PCR using specific primers (Table S1). Controls used for the set of primers were: 1) PCR without the reverse transcription step to verify the absence of DNA; 2) RT-PCR performed without RNA templates to detect any contaminating DNA/RNA; 3) PCR performed using chromosomal DNA as template to ensure primer fidelity; 4) Amplification of a portion of the 23S ribosomal RNA operon using suitable primers as an internal control of the reaction. The RT reaction was performed at 50°C for 40 min, followed by PCR amplification at 94°C for 2 min for 1 cycle; 94°C for 35 s, 58°C for 30 s, 72°C for 1 min for 25 cycles; 72°C for 15 min for 1 cycle. The quantity of amplicon between samples was compared.

### OCTase activity assays

The OCTase activity was determined by measuring OCTase specific activity as previously described [24] by using 5 ml cultures of strains NPS3121 (wild type) and Ynor1P (*phtA*<sup>-</sup>) grown in M9 medium at 28°C during 24 h. Cells were disrupted with a VirTis sonicator (model VirSonic 60), and 3 µl of this crude extract were used for the assay. The reaction mixtures were incubated at 37°C for 20 min and OCTase activity was determined. To eliminate OCTase activity from samples due to the phaseolotoxin-sensitive OCTase, coded by gene *argF*, phaseolotoxin-containing supernatant was added to the reaction mixture. To determine the amount of supernatant enough to achieve an efficient OCTase inhibition, we constructed a standard curve (OCTase activity vs. supernatant) (data not shown). The addition of a phaseolotoxin-containing supernatant to the reaction mixture and a preincubation for 25 min was made before OCTase activity was determined. OCTase specific activity was reported as nmol of citrulline produced per µg of protein per min at 37°C.

### Construction of plasmids containing *argK*, *phtA*, *phtB* and/or *phtC* genes

The *argK*, *phtA*, *phtB* and *phtC* genes were obtained by PCR using primers designed to include suitable restriction sites (Table S1). The *argK*, *argK-phtA*, *argK-phtAB* and *argK-phtABC* amplicons were cloned into the PstI-SmaI sites of the pUCP20 vector to create plasmids pSAK, pSAK-A, pSAK-AB, and pSAK-ABC, respectively. The *phtB*, *phtC* and *phtBC* amplicons were cloned into the SmaI site of pSAK to create pSAK-B, pSAK-C and pSAK-BC, respectively. The *phtC* amplicon was cloned into the SmaI site of pSAK-A to create pSAK-AC (Table 1, Figure 3A). All constructions were confirmed by restriction pattern and electroporated into *P. syringae* pv. phaseolicola.

### RNA extraction and Northern blot analysis

Total RNA was isolated from cultures of *P. syringae* pv. phaseolicola grown in M9 medium at 18°C or 28°C until an O.D.<sub>600</sub> of 0.8 using the TRIzol Reagent as recommended by the manufacturer (Invitrogen). Genomic DNA was removed by digestion with Rnase-free DNase (Roche). Samples of total RNA (25 µg) were denatured by treatment with formamide and separated by electrophoresis using 1.3% denaturing agarose gels. The RNA was transferred to Hybond N<sup>+</sup> nylon membranes (Amersham) and cross-linked by exposure to UV radiation. Hybridization was performed using NorthernMax Prehybridization/Hybridization buffer (Ambion) and a DNA probe for the *argK* gene. The *argK* probe was labeled with [ $\alpha$ -<sup>32</sup>P]dCTP by using the RediPrime Random Primer labeling kit. Hybridization was carried out overnight at 60°C. The membranes were washed twice with 2× SSC-0.1% sodium dodecyl sulfate (1× SSC is 0.15 M NaCl and 0.015 M sodium citrate) for 5 min at room

temperature, followed by a wash with 1× SSC-0.1% sodium dodecyl sulfate for 15 min at 60°C. The membranes were exposed to a phosphorus screen and the signal detected in a Storm 860 apparatus. The analysis was made using ImageQuant version 1.1 (BioRad).

### Induction assays with carbamoylphosphate

Induction assays were conducted as previously reported [21] using cultures of *P. syringae* pv. phaseolicola grown in M9 medium at 28°C to an O.D.<sub>600</sub> of 0.8. Carbamoylphosphate disodium salt (Sigma) was added to the cultures at 1 mM and, after a 30 min incubation, RNA was purified from cultures.

### Colorimetric GUS assays of transcriptional *uidA* fusions

The 1.8-kb EcoRI-SalI fragment containing a promoterless *uidA* gene was obtained from pWM6 [47]. This fragment was cloned into pUCP20 to construct pSAF, containing the promoterless *uidA* gene preceded by a SD sequence. Fragments containing the *argK* promoter and *phtA* promoter (P<sub>KA</sub>), P<sub>KA-phtA</sub>, P<sub>KA-phtAB</sub>, P<sub>KA-phtABC</sub> were obtained by PCR using primers designed to include suitable restriction sites (Table S1) and were cloned into the BamHI-SmaI sites of pSAF to create pSAF-P<sub>KA</sub>, pSAF-A, pSAF-AB and pSAF-ABC respectively. The *phtB*, *phtC* and *phtBC* amplicons were cloned into the SmaI site of pSAF-P<sub>KA</sub> to make pSAF-B; pSAF-C and pSAF-BC respectively. The *phtC* amplicon was cloned into the SmaI site of pSAF-A to create pSAF-AC (Table 1, Figure 3B). The orientations were determined by restriction pattern and constructions were electroporated into strain *P. syringae* pv. phaseolicola CYL233. The activation of the GUS reporter was determined by a colorimetric assay [48]. To analyze GUS activity, *P. syringae* pv. phaseolicola strains carrying *uidA* fusions were grown in M9 medium at 18°C and 28°C and when they reached an O.D.<sub>600</sub> of 0.8 were used. Culture dilutions (1:10) were made and X-Gluc (20 µg/ml) was added. They were incubated at 18°C and 28°C during 6 h and 3 h, respectively, and the presence or absence of blue color in the culture medium was evaluated.

### DNA Electrophoretic mobility shift assay

DNA electrophoretic mobility shift was determined as previously reported [24,49]. A 288-bp DNA probe from the *argK* promoter (P<sub>K</sub>) containing -10 and -35 regions, was obtained by PCR using specific primers (Table S1). The probe was labeled with [ $\gamma$ -<sup>32</sup>P]dATP by using the T4 polynucleotide kinase as recommended by the manufacturer (Invitrogen). Crude extract from cultures were obtained by sonication. The cell pellet was resuspended in extraction buffer [25 mM Tris (pH 8.0), 0.1 mM EDTA, 1 mM dithiothreitol, 10% glycerol, 0.02 mM phenylmethyl-sulfonyl-fluoride] and sonicated using a VirTis sonicator (model VirSonic 60) with three pulses for 10 s with pauses for 10 s. Protein concentration in bacterial lysates was estimated by the procedure of Bradford [46]. The retardation reaction mixture [20 mM Tris (pH 8.0), 50 mM KCl, 1 mM EDTA, 1 mM dithiothreitol, 5% glycerol, 10 ng/µl of poly(dI-dC), 5 µg of crude extract], was preincubated for 15 min at room temperature, the radioactively labeled probe was added, and the mixture was incubated for 25 min at room temperature. Samples were loaded onto 5% polyacrylamide gels and separated at 7 mA for 90 min using Tris-acetate-EDTA buffer. In the competition assays, nonlabelled *argF* promoter probe and nonlabeled pK probe were added. Gels were dried and exposed to phosphorus screen and signal detected in a Storm 860 apparatus and analyzed using ImageQuant version 1.1 (BioRad).



## Supporting Information

**Figure S1 Qualitative assays of *argK* expression using transcriptional fusions with the *uidA* gene.** The wild type strain CYL233 was transformed with plasmids containing a transcriptional fusion between the promoter of *argK* and the *uidA* gene, and different combinations of genes *phtA*, *phtB* and/or *phtC* (see Figure 3 for a description of each plasmid). Cultures were then incubated in the presence of X-Gluc at 18°C and 28°C during 6 h and 3 h, respectively. Each strain is indicated above the corresponding tube. The activation of the GUS reporter was evaluated as presence or absence of blue color in the culture medium. (TIF)

## References

- Mitchell RE (1976) Isolation and structure of a chlorosis-inducing toxin of *Pseudomonas phaseolicola*. *Phytochemistry* 15: 1941–1947.
- Tamura K, Imamura M, Yoneyama K, Kohno Y, Takikawa Y, et al. (2002) Role of phaseolotoxin production by *Pseudomonas syringae* pv. *actinidiae* in the formation of halo lesions of kiwifruit canker disease. *Physiological and Molecular Plant Pathology* 60: 207–214.
- Tourte C, Manceau C (1995) A strain of *Pseudomonas syringae* which does not belong to pathovar *phaseolicola* produces phaseolotoxin. *European Journal of Plant Pathology* 101: 483–490.
- Han HS, Oak EJ, Koh YJ, Hur J-S, Jung JS (2003) Characterization of *Pseudomonas syringae* pv. *actinidiae* isolated in Korea and genetic relationship among coronatine-producing pathovars based on *emaU* sequences. *Acta Horticulturae* 610: 403–408.
- Rico A, López R, Asensio C, Aizpún M, Asensio-S.-Manzanera C, et al. (2003) Nontoxic strains of *P. syringae* pv. *phaseolicola* are a main cause of halo blight of beans in Spain and escape current detection methods. *Phytopathology* 93: 1553–1559.
- Murillo J, Bardaji L, Navarro de la Fuente L, Führer ME, Aguilera S, et al. (2011) Variation in conservation of the cluster for biosynthesis of the phytotoxin phaseolotoxin in *Pseudomonas syringae* suggests at least two events of horizontal acquisition. *Research in Microbiology* 162: 253–261.
- Sawada H, Suzuki F, Matsuda I, Saitou N (1999) Phylogenetic analysis of *Pseudomonas syringae* pathovars suggests the horizontal gene transfer of *argK* and the evolutionary stability of *hrp* gene cluster. *Journal of Molecular Evolution* 49: 627–644.
- Goss RW (1970) The relation of temperature to common and halo blight of beans. *Phytopathology* 30: 258–264.
- Mitchell RE (1978) Halo blight of beans-toxin production by several *Pseudomonas phaseolicola* isolates. *Physiological Plant Pathology* 13: 37–49.
- Niske J, Fritsche W (1989) Phaseolotoxin production by *Pseudomonas syringae* pv. *phaseolicola*: The influence of temperature. *Journal of Basic Microbiology* 29: 441–447.
- Mitchell RE, Johnston JS, Ferguson AR (1981) Phaseolotoxin and other phosphosulfamyl compounds - biological effects. *Physiological Plant Pathology* 19: 227–235.
- Ferguson AR, Johnston JS, Mitchell RE (1980) Resistance of *Pseudomonas syringae* pv. *phaseolicola* to its own toxin, phaseolotoxin. *FEMS Microbiology Letters* 7: 123–125.
- Bachmann AS, Matile P, Slusarenko AJ (1998) Inhibition of ornithine decarboxylase activity by phaseolotoxin: implications for symptom production in halo blight of French bean. *Physiological and Molecular Plant Pathology* 53: 287–299.
- Staskawicz B, Panopoulos NJ (1979) A rapid and sensitive microbiological assay for phaseolotoxin. *Phytopathology* 69: 663–666.
- Peet RC, Panopoulos NJ (1987) Ornithine carbamoyltransferase genes and phaseolotoxin immunity in *Pseudomonas syringae* pv. *phaseolicola*. *EMBO Journal* 6: 3585–3591.
- Staskawicz BJ, Panopoulos NJ (1980) Phaseolotoxin transport in *Escherichia coli* and *Salmonella typhimurium* via the oligopeptide permease. *Journal of Bacteriology* 142: 474–479.
- Jahn O, Sauerstein J, Reuter G (1985) Detection of two ornithine carbamoyltransferases in a phaseolotoxin-producing strain of *Pseudomonas syringae* pv. *phaseolicola*. *Journal of Basic Microbiology* 25: 543–546.
- Jahn O, Sauerstein J, Reuter G (1987) Characterization of two ornithine carbamoyltransferases from *Pseudomonas syringae* pv. *phaseolicola*, the producer of phaseolotoxin. *Archives of Microbiology* 147: 174–178.
- Hatziloukas E, Panopoulos NJ (1992) Origin, structure, and regulation of *argK*, encoding the phaseolotoxin-resistant ornithine carbamoyltransferase in *Pseudomonas syringae* pv. *phaseolicola*, and functional expression of *argK* in transgenic tobacco. *Journal of Bacteriology* 174: 5895–5909.
- Mosqueda G, Van den Broeck G, Saucedo O, Bailey A, Alvarez-Morales A, et al. (1990) Isolation and characterization of the gene from *Pseudomonas syringae* pv. *phaseolicola* encoding the phaseolotoxin-insensitive ornithine carbamoyltransferase. *Molecular and General Genetics* 222: 461–466.
- López-López K, Hernández-Flores JL, Cruz-Aguilar M, Alvarez-Morales A (2004) In *Pseudomonas syringae* pv. *phaseolicola*, expression of the *argK* gene, encoding the phaseolotoxin-resistant ornithine carbamoyltransferase, is regulated indirectly by temperature and directly by a precursor resembling carbamoylphosphate. *Journal of Bacteriology* 186: 146–153.
- Rowley KB, Clements DE, Mandel M, Humphreys T, Patil SS (1993) Multiple copies of a DNA sequence from *Pseudomonas syringae* pathovar *phaseolicola* abolish thermoregulation of phaseolotoxin production. *Molecular Microbiology* 8: 625–635.
- Rowley KB, Xu R, Patil SS (2000) Molecular analysis of thermoregulation of phaseolotoxin-resistant ornithine carbamoyltransferase (*argK*) from *Pseudomonas syringae* pv. *phaseolicola*. *Molecular Plant-Microbe Interactions* 13: 1071–1080.
- Hernández-Flores JL, López-López K, Garcidueñas-Piña R, Jofre-Garfias AE, Alvarez-Morales A (2004) The global arginine regulator ArgR controls expression of *argF* in *Pseudomonas syringae* pv. *phaseolicola* but is not required for the synthesis of phaseolotoxin or for the regulated expression of *argK*. *Journal of Bacteriology* 186: 3653–3655.
- Aguilera S, López-López K, Nieto Y, Garcidueñas-Piña R, Hernández-Guzmán G, et al. (2007) Functional characterization of the gene cluster from *Pseudomonas syringae* pv. *phaseolicola* NPS3121 involved in synthesis of phaseolotoxin. *Journal of Bacteriology* 189: 2834–2843.
- Genka H, Baba T, Tsuda M, Kanaya S, Mori H, et al. (2006) Comparative analysis of *argK*-tox clusters and their flanking regions in phaseolotoxin-producing *Pseudomonas syringae* pathovars. *Journal of Molecular Evolution* 63: 401–414.
- Peet RC, Lindgren PB, Willis DK, Panopoulos NJ (1986) Identification and cloning of genes involved in phaseolotoxin production by *Pseudomonas syringae* pv. “*phaseolicola*”. *Journal of Bacteriology* 166: 1096–1105.
- Zhang Y, Rowley K, Patil S (1993) Genetic organization of a cluster of genes involved in the production of phaseolotoxin, a toxin produced by *Pseudomonas syringae* pv. *phaseolicola*. *Journal of Bacteriology* 175: 6451–6458.
- De la Torre-Zavala S, Aguilera S, Ibarra-Laclette E, Hernández-Flores JL, Hernández-Morales A, et al. (2011) Gene expression of Pht cluster genes and a putative non-ribosomal peptide synthetase required for phaseolotoxin production is regulated by GacS/GacA in *Pseudomonas syringae* pv. *phaseolicola*. *Research in Microbiology* 162: 488–498.
- Hernández-Guzmán G, Alvarez-Morales A (2001) Isolation and characterization of the gene coding for the amidinotransferase involved in the biosynthesis of phaseolotoxin in *Pseudomonas syringae* pv. *phaseolicola*. *Molecular Plant-Microbe Interactions* 14: 545–554.
- West SEH, Schweizer HP, Dall C, Sample AK, Runyen-Janecky LJ (1994) Construction of improved *Escherichia-Pseudomonas* shuttle vectors derived from pUC18/19 and sequence of the region required for their replication in *Pseudomonas aeruginosa*. *Gene* 128: 81–86.
- Altschul SF, Madden TL, Schäffer AA, Zhang J, Zhang Z, et al. (1997) Gapped BLAST and PSI-BLAST: a new generation of protein database search programs. *Nucleic Acids Research* 25: 3389–3402.
- Arvizu-Gómez JL, Hernández-Morales A, Pastor-Palacios G, Bribea LG, Alvarez-Morales A (2011) Integration Host Factor (IHF) binds to the promoter region of the *phtD* operon involved in phaseolotoxin synthesis in *P. syringae* pv. *phaseolicola* NPS3121. *BMC Microbiology* 11: 90.
- Bender CL, Alarcón-Chaidez F, Gross DC (1999) *Pseudomonas syringae* phytotoxins: Mode of action, regulation, and biosynthesis by peptide and polyketide synthetases. *Microbiology and Molecular Biology Reviews* 63: 266–292.
- Bender CL, Liyanage H, Palmer D, Ullrich M, Young S, et al. (1993) Characterization of the genes controlling the biosynthesis of the polyketide phytotoxin coronatine including conjugation between coronafacic and coronamic acid. *Gene* 133: 31–38.
- Ullrich M, Peñaloza-Vázquez A, Bailey AM, Bender CL (1995) A modified two-component regulatory system is involved in temperature-dependent biosynthesis

**Table S1 List of primers used for the amplification of *pht* genes.** (DOC)

## Acknowledgments

The authors would like to thank Gabriela Olmedo-Alvarez for her helpful discussions and suggestions.

## Author Contributions

Conceived and designed the experiments: SA AAM. Performed the experiments: SA SDTZ JLHF JB. Analyzed the data: SA SDTZ JLHF JM JB AAM. Contributed reagents/materials/analysis tools: JM AAM. Wrote the paper: SA JM AAM.

- of the *Pseudomonas syringae* phytotoxin coronatine. *Journal of Bacteriology* 177: 6160–6169.
37. Kitten T, Kinscherf TG, McEvoy JL, Willis DK (1998) A newly identified regulator is required for virulence and toxin production in *Pseudomonas syringae*. *Molecular Microbiology* 28: 917–929.
  38. Chatterjee A, Cui Y, Yang H, Collmer A, Alfano JR, et al. (2003) GacA, the response regulator of a two-component system, acts as a master regulator in *Pseudomonas syringae* pv. tomato DC3000 by controlling regulatory RNA, transcriptional activators, and alternate sigma factors. *Molecular Plant-Microbe Interactions* 16: 1106–1117.
  39. Hrabak EM, Willis DK (1992) The *lemA* gene required for pathogenicity of *Pseudomonas syringae* pv. *syringae* on bean is a member of a family of two-component regulators. *Journal of Bacteriology* 174: 3011–3020.
  40. Chothia C, Gough J, Vogel C, Teichmann SA (2003) Evolution of the protein repertoire. *Science* 300: 1701–1703.
  41. Sambrook J, Fritsch EF, Maniatis T (1989) *Molecular cloning: a laboratory manual*. Cold Spring Harbor, NY: Cold Spring Harbor Laboratory.
  42. Cuppels DA (1986) Generation and characterization of Tn5 insertion mutations in *Pseudomonas syringae* pv. *tomato*. *Applied and Environmental Microbiology* 51: 323–327.
  43. Loper JE, Lindow SE (1987) Lack of evidence for *in situ* fluorescent pigment production by *Pseudomonas syringae* pv. *syringae* on bean leaf surfaces. *Phytopathology* 77: 1449–1454.
  44. King EO, Ward NK, Rancy DE (1954) Two simple media for the demonstration of pyocyanin and fluorescein. *Journal of Laboratory and Clinical Medicine* 44: 301–307.
  45. Chen WP, Kuo TT (1993) A simple and rapid method for the preparation of Gram-negative bacterial genomic DNA. *Nucleic Acids Research* 21: 2260–2260.
  46. Bradford MM (1976) A rapid and sensitive method for the quantitation of microgram quantities of protein utilizing the principle of protein-dye binding. *Analytical Biochemistry* 72: 248–254.
  47. Metcalf WW, Wanner BL (1993) Construction of new beta-glucuronidase cassettes for making transcriptional fusions and their use with new methods for allele replacement. *Gene* 129: 17–25.
  48. Jefferson RA, Kavanagh TA, Bevan MW (1987) GUS fusions: beta-glucuronidase as a sensitive and versatile gene fusion marker in higher plants. *EMBO Journal* 6: 3901–3907.
  49. Park SM, Lu CD, Abdelal AT (1997) Purification and characterization of an arginine regulatory protein, ArgR, from *Pseudomonas aeruginosa* and its interactions with the control regions for the *car*, *argF*, and *aru* operons. *Journal of Bacteriology* 179: 5309–5317.
